# Supplementary material for: Use of a highly specific kinase inhibitor for rapid, simple and precise synchronization of Plasmodium falciparum and Plasmodium knowlesi asexual blood-stage parasites
Source: PubMed Central journal article supplement (PMC7365400; doi:10.1371/journal.pone.0235798), 2020-07-16

## Supp. figure 2

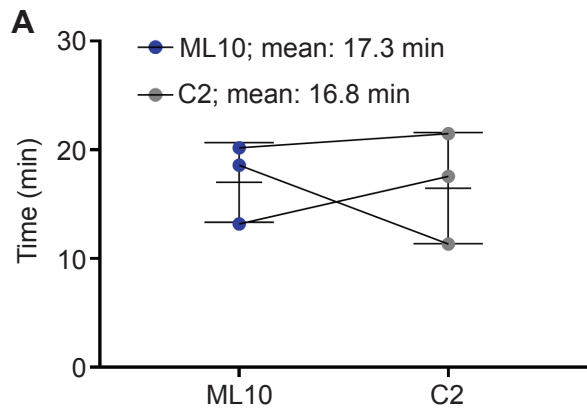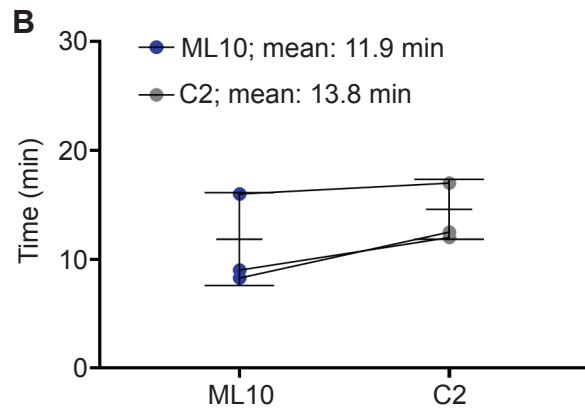

Supplement: pone.0235798.s002.pdf [file pone.0235798.s002.pdf]
